# Supplementary material for: H/D Isotope Effects on 1H-NMR Chemical Shifts in Cyclic Heterodimers and Heterotrimers of Phosphinic and Phosphoric Acids
Source: Molecules. 2020 Apr 20;25(8):1907. doi: 10.3390/molecules25081907 (PMC7221807; doi:10.3390/molecules25081907)
Supplement: Supplementary file 1 [file molecules-25-01907-s001.pdf]

**H/D Isotope Effects on  $^1\text{H}$  NMR Chemical Shifts in Cyclic Heterodimers and Heterotrimers of Phosphinic and Phosphoric Acids**

**Valeria V. Mulloyarova<sup>1</sup>, Daria O. Ustimchuk<sup>1</sup>, Aleksander Filarowski<sup>2</sup>, Peter M. Tolstoy<sup>1,\*</sup>**

<sup>1</sup> Institute of Chemistry, St. Petersburg State University, Universitetskij pr. 26, 198504 St. Petersburg, Russia; [myllerka20071993@gmail.com](mailto:myllerka20071993@gmail.com) (V.V.M.); [ustimchuk.d@yandex.ru](mailto:ustimchuk.d@yandex.ru) (D.O.U.)

<sup>2</sup> Faculty of Chemistry, University of Wrocław, 14 F. Joliot-Curie str., 50-383 Wrocław, Poland; [aleksander.filarowski@chem.uni.wroc.pl](mailto:aleksander.filarowski@chem.uni.wroc.pl)

\* Correspondence: [peter.tolstoy@spbu.ru](mailto:peter.tolstoy@spbu.ru); tel.: +7-921-430-8191

| Contents                                                                                                                                                              | Page |
|-----------------------------------------------------------------------------------------------------------------------------------------------------------------------|------|
| <b>Figure S1.</b> The low-field part of $^1\text{H}$ NMR spectrum of a mixture of acids <b>2</b> and <b>3</b> .                                                       | 2    |
| <b>Figure S2.</b> Parts of $^{31}\text{P}$ NMR spectrum of a mixture of acids <b>2</b> and <b>3</b> .                                                                 | 3    |
| <b>Figure S3.</b> The low-field part of $^1\text{H}$ NMR spectrum of a mixture of acids <b>2</b> and <b>4</b> .                                                       | 4    |
| <b>Figure S4.</b> Parts of $^{31}\text{P}$ NMR spectrum of a mixture of acids <b>2</b> and <b>4</b> .                                                                 | 5    |
| <b>Figure S5.</b> The low-field part of $^1\text{H}$ NMR spectrum of a mixture of acids <b>3</b> and <b>4</b> .                                                       | 6    |
| <b>Figure S6.</b> Parts of $^{31}\text{P}$ NMR spectrum of a mixture of acids <b>3</b> and <b>4</b> .                                                                 | 7    |
| <b>Figure S7.</b> Probabilities of various isotopologs and relative intensities of their signals as a function of deuteration ratio $x_{\text{D}}$ .                  | 8    |
| <b>Figure S8.</b> The low-field part of $^1\text{H}$ NMR spectrum of a mixture of partially deuterated acids <b>2</b> and <b>3</b> .                                  | 9    |
| <b>Figure S9.</b> The low-field parts of $^1\text{H}$ NMR spectra of a mixture of partially deuterated acids <b>3</b> and <b>4</b> at various degrees of deuteration. | 10   |
| <b>Table S1.</b> $^{31}\text{P}$ NMR chemical shifts of homodimers and heterodimers of acids <b>1–4</b> .                                                             | 11   |
| <b>Table S2.</b> $^{31}\text{P}$ NMR chemical shifts of homotrimers and heterotrimers of acids <b>1–4</b> .                                                           | 12   |
| <b>Figure S10.</b> The analysis of H/D fractionation factors for a mixture of partially deuterated acids <b>2</b> and <b>3</b> .                                      | 13   |
| <b>Table S3.</b> The deuteration ratios of individual hydrogen bonds for the sample of a mixture of partially deuterated acids <b>2</b> and <b>3</b> .                | 13   |

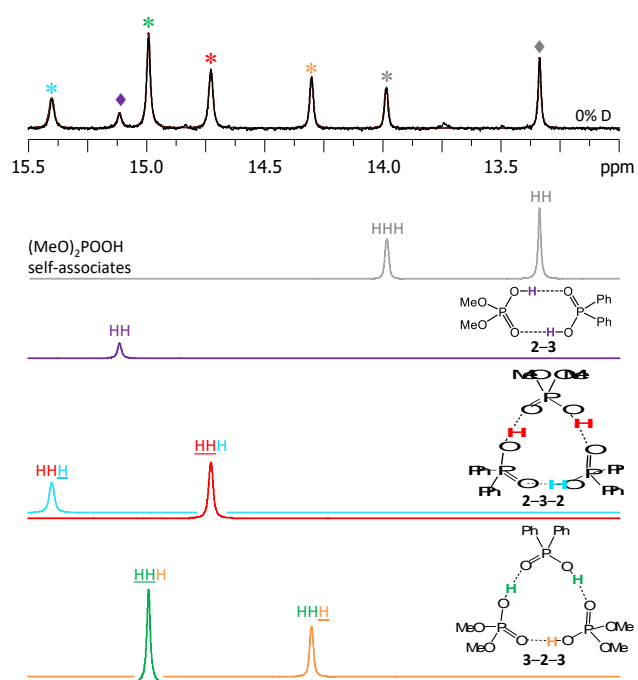

**Figure S1.** The low-field part of  $^1\text{H}$  NMR spectrum of the sample containing acids **2** and **3** (1.8:1) in  $\text{CDF}_3/\text{CDF}_2\text{Cl}$  at 100 K. The experimental spectrum is deconvoluted into the sub-spectra arising from self-associated of **2**, heterodimer **2-3** and two heterotrimers, **2-3-2** and **3-2-3**. For visual clarify the signals in the experimental spectrum and the computed sub-spectra are color coded.

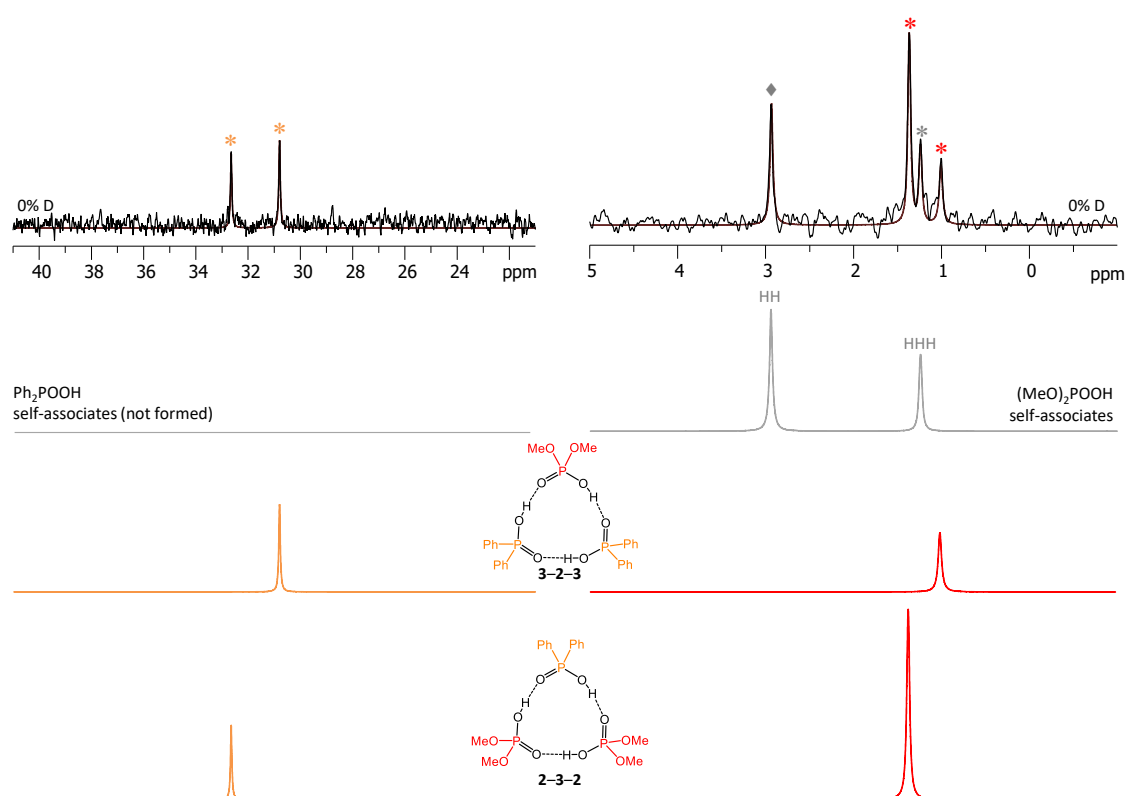

**Figure S2.** The parts of  $^{31}\text{P}$  NMR spectrum of the sample containing acids **2** and **3** (1.8:1) in  $\text{CDF}_3/\text{CDF}_2\text{Cl}$  at 100 K. The experimental spectrum is deconvoluted into the sub-spectra arising from self-associated of **2** and two heterotrimers, **2-3-2** and **3-2-3**. The self-associates of **3** are not formed, while the signals of heterodimer **2-3** are not detected due to their low intensity. For visual clarify the signals in the experimental spectrum and the computed sub-spectra are color coded.

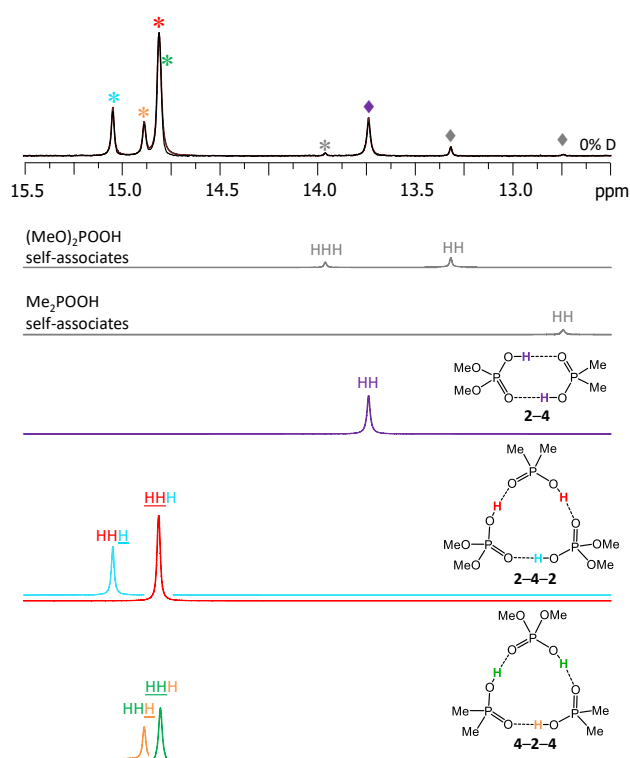

**Figure S3.** The low-field part of  $^1\text{H}$  NMR spectrum of the sample containing acids **2** and **4** (1.3:1) in  $\text{CDF}_3/\text{CDF}_2\text{Cl}$  at 100 K. The experimental spectrum is deconvoluted into the sub-spectra arising from self-associated of **2** or **4**, heterodimer **2-4** and two heterotrimers, **2-4-2** and **4-2-4**. For visual clarify the signals in the experimental spectrum and the computed sub-spectra are color coded.

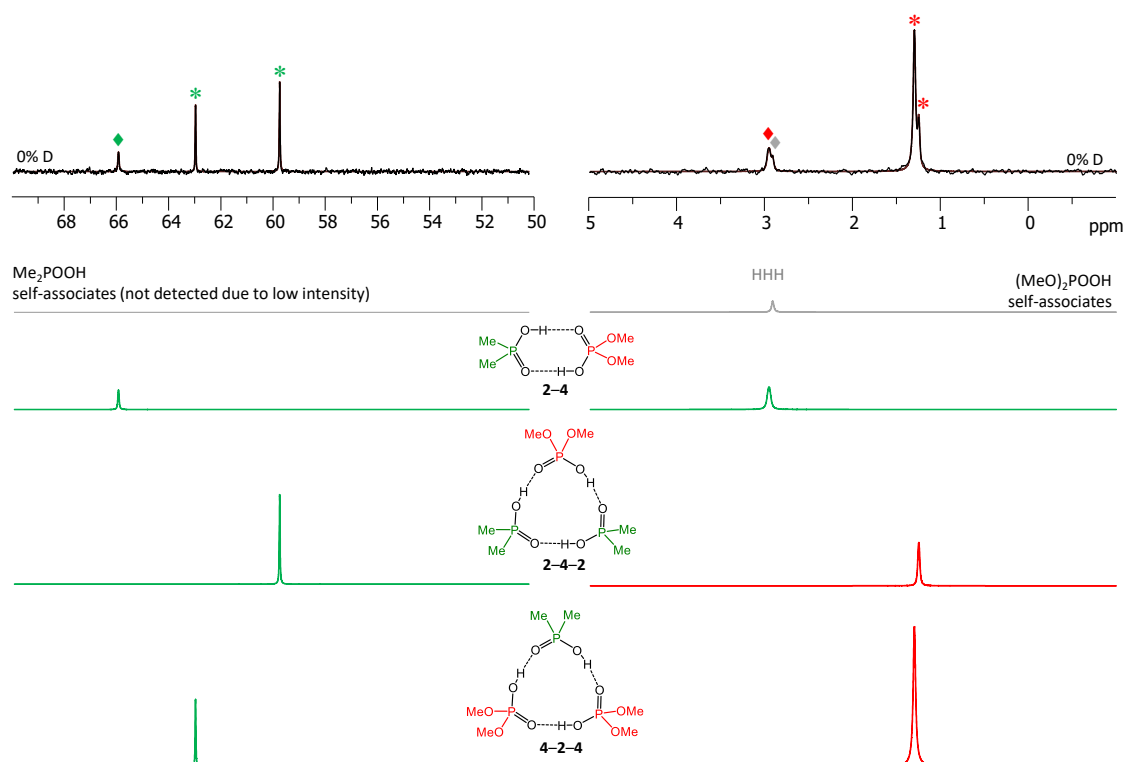

**Figure S4.** The parts of  $^{31}\text{P}$  NMR spectrum of the sample containing acids **2** and **4** (1.3:1) in  $\text{CDF}_3/\text{CDF}_2\text{Cl}$  at 100 K. The experimental spectrum is deconvoluted into the sub-spectra arising from self-associated of **2**, heterodimer **2-4** and two heterotrimers, **2-4-2** and **4-2-4**. The self-associates of **4** are not detected due to the low intensity of their signals. For visual clarify the signals in the experimental spectrum and the computed sub-spectra are color coded.

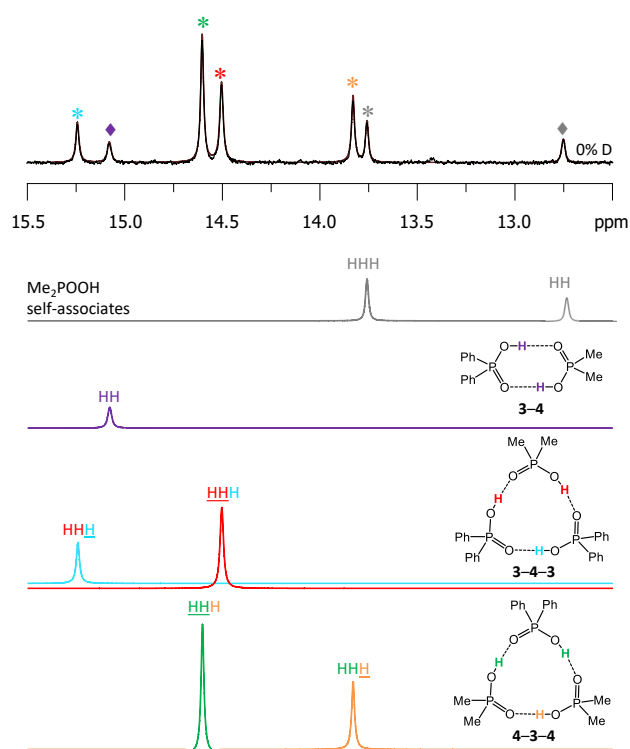

**Figure S5.** The low-field part of  $^1\text{H}$  NMR spectrum of the sample containing acids **3** and **4** (1:1.4) in  $\text{CDF}_3/\text{CDF}_2\text{Cl}$  at 100 K. The experimental spectrum is deconvoluted into the sub-spectra arising from self-associated of **4**, heterodimer **3-4** and two heterotrimers, **3-4-3** and **4-3-4**. For visual clarify the signals in the experimental spectrum and the computed sub-spectra are color coded.

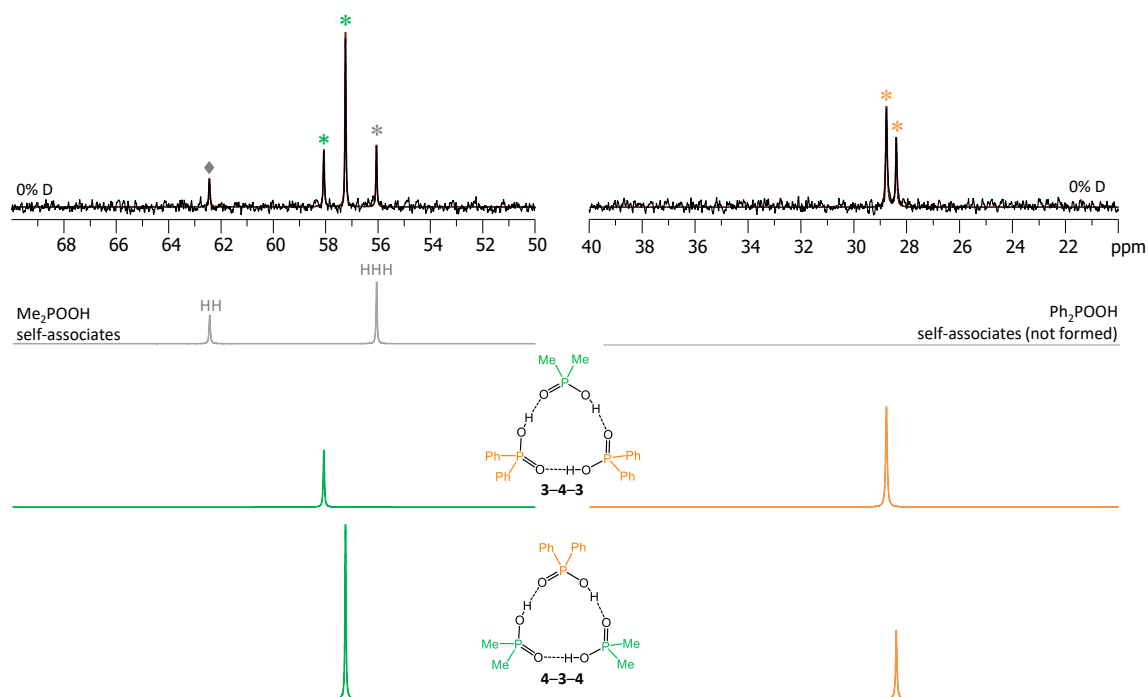

**Figure S6.** The parts of  $^{31}\text{P}$  NMR spectrum of the sample containing acids **3** and **4** (1:1.4) in  $\text{CDF}_3/\text{CDF}_2\text{Cl}$  at 100 K. The experimental spectrum is deconvoluted into the sub-spectra arising from self-associated of **4**, heterodimer **3-4** and two heterotrimers, **3-4-3** and **4-3-4**. The self-associates of **3** are not formed, while the signals of heterodimer **3-4** are not detected due to their low intensity. For visual clarify the signals in the experimental spectrum and the computed sub-spectra are color coded.

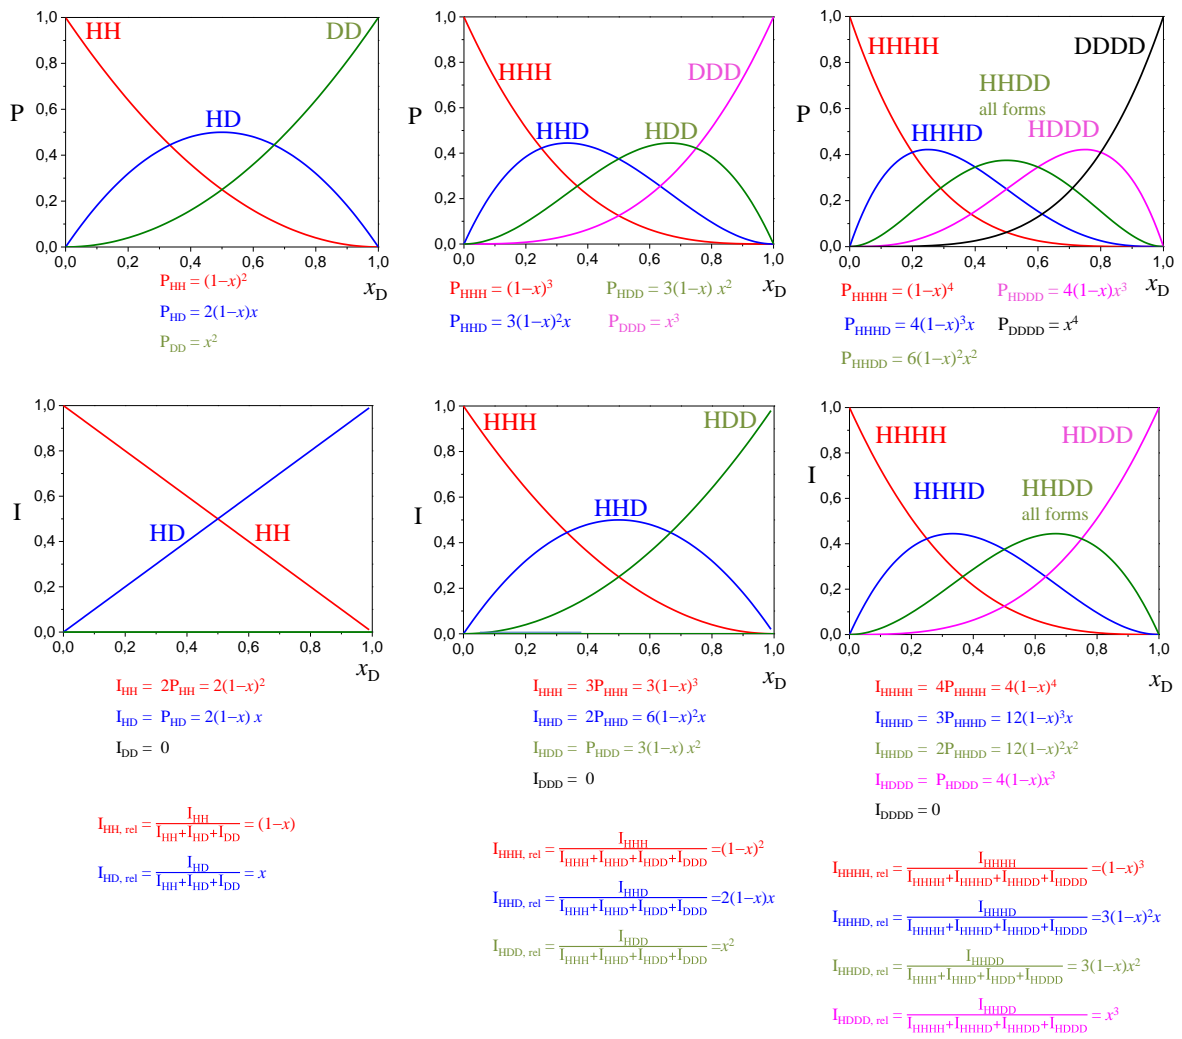

**Figure S7.** The probabilities of various isotopologs (top) and the relative integrated intensities of their  $^1\text{H}$  NMR signals (bottom) calculated for cyclic dimers (left) and cyclic trimers (center) and cyclic tetramers of the X-Y-X-Y type (right) as a function of the deuterium ratio  $x_D$ .

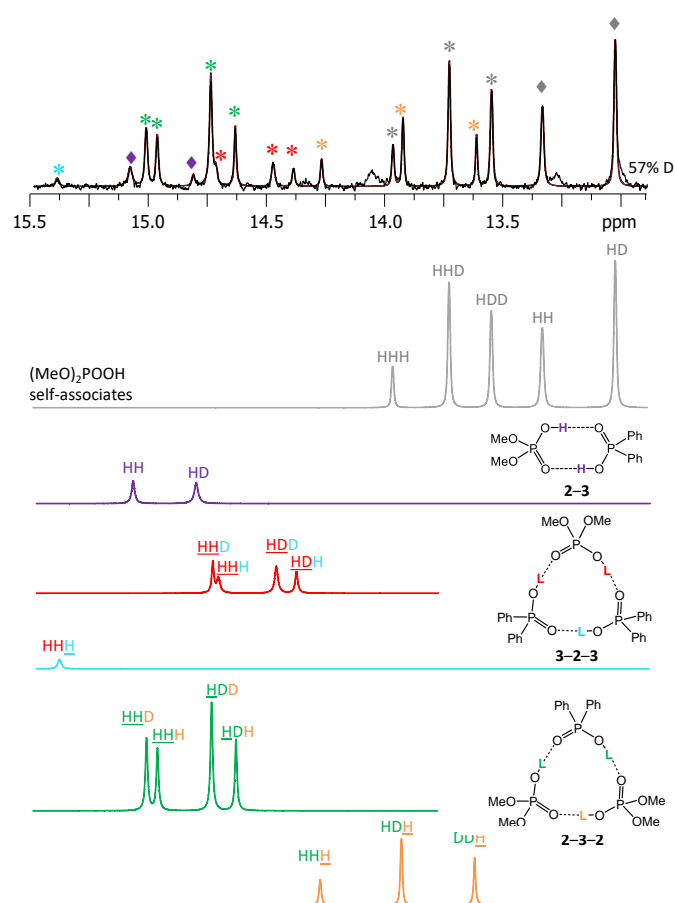

**Figure S8.** The low-field part of  $^1\text{H}$  NMR spectrum of the sample containing partially deuterated (OH/OD, 57% D) acids **2** and **3** (4:1) in solution in  $\text{CDF}_3/\text{CDF}_2\text{Cl}$  at 100 K. The experimental spectrum is deconvoluted into the sub-spectra arising from various isotopologs of self-associates, heterodimer and heterotrimers. For visual clarify the signals in the experimental spectrum and the computed sub-spectra are color coded.

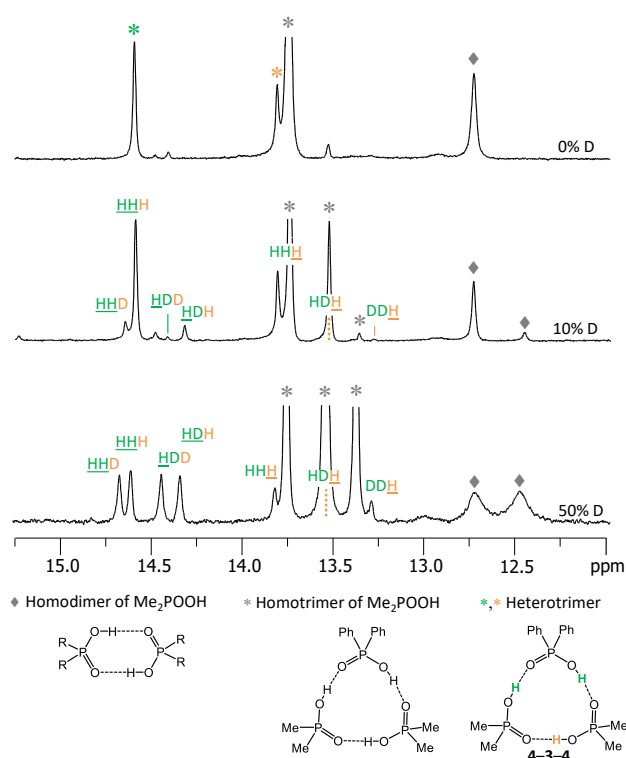

**Figure S9.** The low-field part of  $^1\text{H}$  NMR spectra of the sample containing partially deuterated (OH/OD, from top to bottom: 0% D, 10% D, 50% D) acids **3** and **4** (1:22) in solution in  $\text{CDF}_3/\text{CDF}_2\text{Cl}$  at 100 K. Due to the large excess of acid **3** only one type of hetero-complex is formed, namely, a heterotrimer **4-3-4**. The evolution of the relative intensities of signals as a function of the deuteration ratio was used to assign the signals to particular isotopologs. For visual clarify the signals in the experimental spectrum and in the computed sub-spectra are color coded.

**Table S1.** The  $^{31}\text{P}$  NMR chemical shifts of various isotopologs of homodimers and heterodimers of POOH-containing acids **1–4** in  $\text{CDF}_3/\text{CDF}_2\text{Cl}$  at 100 K. The corresponding spectra are shown in Figures 4, 6, 8 and Figures S2, S4, S6.

| Complex                 | $(\text{PhO})_2\text{POOH}$ | $(\text{MeO})_2\text{POOH}$ | $\text{Ph}_2\text{POOH}$ | $\text{Me}_2\text{POOH}$ |
|-------------------------|-----------------------------|-----------------------------|--------------------------|--------------------------|
| <b>1-1</b> <sup>a</sup> | −8.09                       | -                           | -                        | -                        |
| <b>2-2</b> <sup>b</sup> | -                           | 2.91                        | -                        | -                        |
| <b>3-3</b> <sup>c</sup> | -                           | -                           | n.d. <sup>d</sup>        | -                        |
| <b>4-4</b> <sup>a</sup> | -                           | -                           | -                        | 62.46                    |
| <b>1-2</b>              | −7.88                       | 2.64                        | -                        | -                        |
| <b>1-3</b>              | n.m. <sup>e</sup>           | -                           | -                        | n.m.                     |
| <b>1-4</b>              | −8.17                       | -                           | -                        | 72.99                    |
| <b>2-3</b>              | -                           | n.d.                        | n.d.                     | -                        |
| <b>2-4</b>              | -                           | 2.96                        | -                        | 65.92                    |
| <b>3-4</b>              | -                           | -                           | n.d.                     | n.d.                     |

<sup>a</sup> – chemical shifts found in this work coincide with those reported previously in [Mulloyarova, V.V.; Giba, I.S.; Kostin, M.A.; Denisov, G.S.; Shenderovich, I.G.; Tolstoy, P.M. Cyclic trimers of phosphinic acids in polar aprotic solvent: symmetry, chirality and H/D isotope effects on NMR chemical shifts. *Phys. Chem. Chem. Phys.* **2018**, 20, 4901–4910.].

<sup>b</sup> – chemical shifts match reasonably well those reported previously in Ref. [Detering, C.; Tolstoy, P.M.; Golubev, N.S.; Denisov, G.S.; Limbach, H.H. Vicinal H/D isotope effects in NMR spectra of complexes with coupled hydrogen bonds: phosphoric acids. *Dokl. Phys. Chem.* **2001**, 379, 191–193.].

<sup>c</sup> – the diphenylphosphinic acid **3** is poorly soluble in  $\text{CDF}_3/\text{CDF}_2\text{Cl}$  and does not form self-associates in a detectable amount

<sup>d</sup> – n.d. – not detected.

<sup>e</sup> – n.m. – not measured.

**Table S2.** The  $^{31}\text{P}$  NMR chemical shifts of various isotopologs of homotrimers and heterotrimers of POOH-containing acids **1–4** in  $\text{CDF}_3/\text{CDF}_2\text{Cl}$  at 100 K. The corresponding spectra are shown in Figures 4, 6, 8 and Figures S2, S4, S6.

| Complex                   | $(\text{PhO})_2\text{POOH}$ | $(\text{MeO})_2\text{POOH}$ | $\text{Ph}_2\text{POOH}$ | $\text{Me}_2\text{POOH}$ |
|---------------------------|-----------------------------|-----------------------------|--------------------------|--------------------------|
| <b>1-1-1</b> <sup>a</sup> | −11.56                      | -                           | -                        | -                        |
| <b>2-2-2</b> <sup>b</sup> | -                           | 1.22                        | -                        | -                        |
| <b>3-3-3</b> <sup>c</sup> | -                           | -                           | n.d. <sup>d</sup>        | -                        |
| <b>4-4-4</b> <sup>a</sup> | -                           | -                           | -                        | 56.07                    |
| <b>1-2-1</b>              | −11.43                      | 1.15                        | -                        | -                        |
| <b>2-1-2</b>              | −11.62                      | 1.20                        | -                        | -                        |
| <b>1-3-1</b>              | −11.65                      | -                           | 37.85                    | -                        |
| <b>3-1-3</b>              | −12.25                      | -                           | 33.68                    | -                        |
| <b>1-4-1</b>              | −11.46                      | -                           | -                        | 71.55                    |
| <b>4-1-4</b>              | −11.50                      | -                           | -                        | 63.86                    |
| <b>2-3-2</b>              | -                           | 1.37                        | 32.65                    | -                        |
| <b>3-2-3</b>              | -                           | 1.00                        | 30.79                    | -                        |
| <b>2-4-2</b>              | -                           | 1.30                        | -                        | 62.93                    |
| <b>4-2-4</b>              | -                           | 1.25                        | -                        | 59.66                    |
| <b>3-4-3</b>              | -                           | -                           | 28.76                    | 58.07                    |
| <b>4-3-4</b>              | -                           | -                           | 28.39                    | 57.24                    |

<sup>a</sup> – chemical shifts found in this work coincide with those reported previously in [Mulloyarova, V.V.; Giba, I.S.; Kostin, M.A.; Denisov, G.S.; Shenderovich, I.G.; Tolstoy, P.M. Cyclic trimers of phosphinic acids in polar aprotic solvent: symmetry, chirality and H/D isotope effects on NMR chemical shifts. *Phys. Chem. Chem. Phys.* **2018**, 20, 4901–4910.].

<sup>b</sup> – chemical shifts match reasonably well those reported previously in Ref. [Detering, C.; Tolstoy, P.M.; Golubev, N.S.; Denisov, G.S.; Limbach, H.H. Vicinal H/D isotope effects in NMR spectra of complexes with coupled hydrogen bonds: phosphoric acids. *Dokl. Phys. Chem.* **2001**, 379, 191–193.].

<sup>c</sup> – the diphenylphosphinic acid **3** is poorly soluble in  $\text{CDF}_3/\text{CDF}_2\text{Cl}$  and does not form self-associates in a detectable amount

<sup>d</sup> – n.d. – not detected.

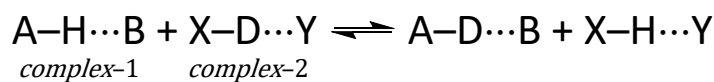

$$\text{fractionation factor } \varphi_{1-2} = \frac{([D]/[H])_{\text{complex-1}}}{([D]/[H])_{\text{complex-2}}}$$

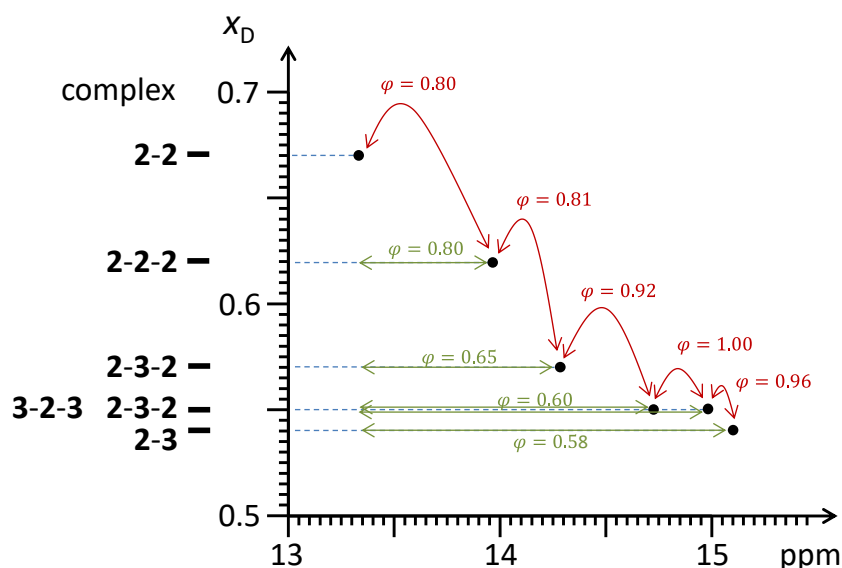

**Figure S10.** The analysis of H/D fractionation factors for a mixture of partially deuterated acids **2** and **3**, based on the  $^1\text{H}$  NMR spectrum shown in Figure S8 and the individual deuteration ratios listed in Table S3.

**Note:** the H/D fractionation factors are defined with respect to a standard/reference, which is usually water. In our case the fractionation factors were calculated either with respect to one of the complexes (green labels in Figure S10) or within a selected pair of complexes (red labels). It has to be mentioned that for many other samples the changes of deuteration ratios  $x_D$  between individual complexes are either too small or lie within the experimental error.

**Table S3.** The deuteration ratios of individual hydrogen bonds for the sample of a mixture of partially deuterated acids **2** and **3** (see  $^1\text{H}$  NMR spectrum in Figure S8). Note that intensities of some isotopologs are too small to reliably measure the deuteration ratio (this is why only one signal of heterotrimer **3-2-3** was analyzed).

| Complex               | 2-2   | 2-2-2 | 2-3-2 | 3-2-3 | 2-3-2 | 2-3   |
|-----------------------|-------|-------|-------|-------|-------|-------|
| $\delta\text{H, ppm}$ | 13.33 | 13.96 | 14.29 | 14.72 | 14.98 | 15.10 |
| $x_D$                 | 0.67  | 0.62  | 0.57  | 0.55  | 0.55  | 0.54  |
